# Supplementary material for: Transcriptional reprogramming of tomato (Solanum lycopersicum L.) roots treated with humic acids and filter sterilized compost tea
Source: PubMed Central journal article supplement — BMC Plant Biol. 2024 Sep 30;24:894. doi: 10.1186/s12870-024-05602-7 (PMC11441126; doi:10.1186/s12870-024-05602-7), 2024-09-30
Supplement: 12870_2024_5602_MOESM1_ESM.pdf [file 12870_2024_5602_MOESM1_ESM.pdf]

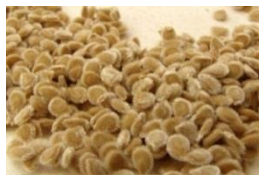

Seed germination

Biostimulant treatment

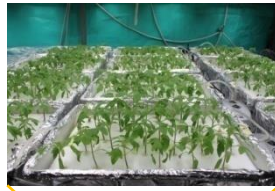

3 days

22 days

24-48-72 hpi

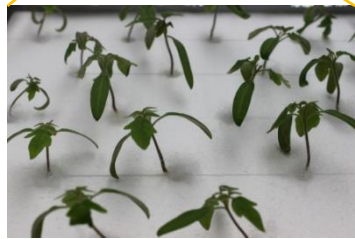

Transplant on 30-well polystyrene trays floating

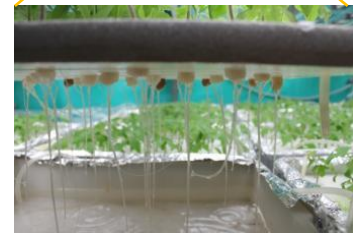

Tank 1 Control

Tank 2 Control

Tank 3 Control

Root samples were collected removing plant from the hole

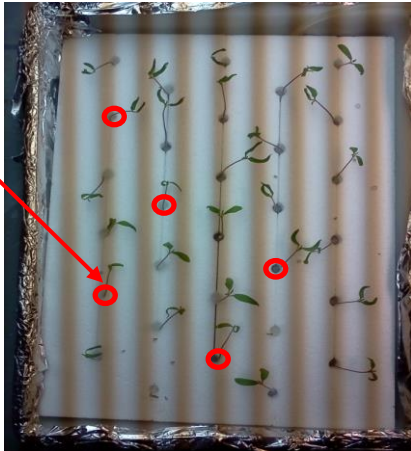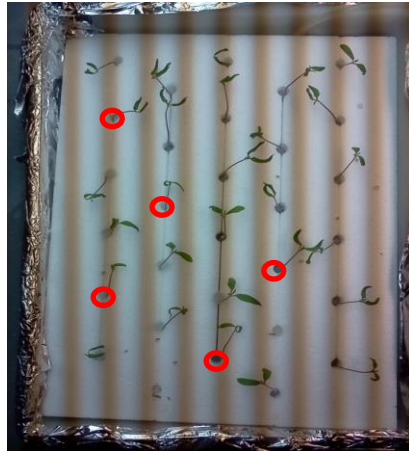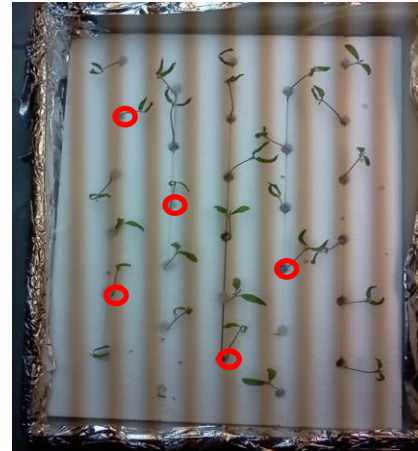

Example of root sample collection from Control treatment

Pooled sample

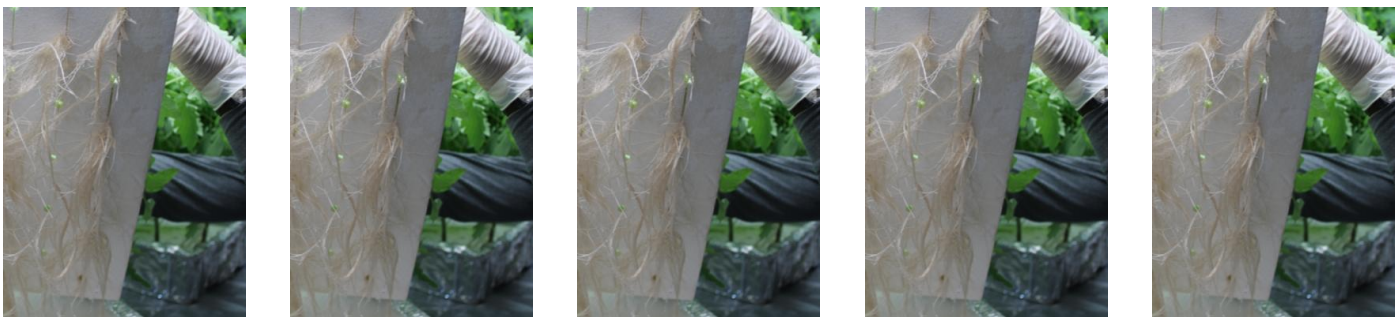

Sample

RNA extracion and RNA-Seq analysis
