# Supplementary material for: Transcriptional reprogramming of tomato (Solanum lycopersicum L.) roots treated with humic acids and filter sterilized compost tea
Source: PubMed Central journal article supplement — BMC Plant Biol. 2024 Sep 30;24:894. doi: 10.1186/s12870-024-05602-7 (PMC11441126; doi:10.1186/s12870-024-05602-7), 2024-09-30
Supplement: 12870_2024_5602_MOESM3_ESM.pdf [file 12870_2024_5602_MOESM3_ESM.pdf]

**A**

|               |               |               |
|---------------|---------------|---------------|
| <b>Rep. A</b> | 0.95          | 0.88          |
|               | <b>Rep. B</b> | 0.74          |
|               |               | <b>Rep. C</b> |

|                     |  |  |
|---------------------|--|--|
| <b>Control 24 h</b> |  |  |
| <b>Control 48 h</b> |  |  |
| <b>Control 72 h</b> |  |  |

|               |               |               |
|---------------|---------------|---------------|
| <b>Rep. A</b> | 0.98          | 0.97          |
|               | <b>Rep. B</b> | 0.97          |
|               |               | <b>Rep. C</b> |

|               |               |               |
|---------------|---------------|---------------|
| <b>Rep. A</b> | 0.97          | 0.97          |
|               | <b>Rep. B</b> | 0.98          |
|               |               | <b>Rep. C</b> |

**B**

|               |               |               |
|---------------|---------------|---------------|
| <b>Rep. A</b> | 0.97          | 0.57          |
|               | <b>Rep. B</b> | 0.58          |
|               |               | <b>Rep. C</b> |

|                         |  |  |
|-------------------------|--|--|
| <b>Humic acids 24 h</b> |  |  |
| <b>Humic acids 48 h</b> |  |  |
| <b>Humic acids 72 h</b> |  |  |

|               |               |               |
|---------------|---------------|---------------|
| <b>Rep. A</b> | 0.97          | 0.68          |
|               | <b>Rep. B</b> | 0.67          |
|               |               | <b>Rep. C</b> |

|               |               |               |
|---------------|---------------|---------------|
| <b>Rep. A</b> | 0.85          | 0.79          |
|               | <b>Rep. B</b> | 0.95          |
|               |               | <b>Rep. C</b> |

**C**

|               |               |               |
|---------------|---------------|---------------|
| <b>Rep. A</b> | 0.57          | 0.53          |
|               | <b>Rep. B</b> | 0.98          |
|               |               | <b>Rep. C</b> |

|                         |  |  |
|-------------------------|--|--|
| <b>Compost tea 24 h</b> |  |  |
| <b>Compost tea 48 h</b> |  |  |
| <b>Compost tea 72 h</b> |  |  |

|               |               |               |
|---------------|---------------|---------------|
| <b>Rep. A</b> | 0.66          | 0.97          |
|               | <b>Rep. B</b> | 0.64          |
|               |               | <b>Rep. C</b> |

|               |               |               |
|---------------|---------------|---------------|
| <b>Rep. A</b> | 0.71          | 0.98          |
|               | <b>Rep. B</b> | 0.70          |
|               |               | <b>Rep. C</b> |
