# Supplementary figures and images for: Transcriptional reprogramming of tomato (Solanum lycopersicum L.) roots treated with humic acids and filter sterilized compost tea
Source: PubMed Central journal article supplement — BMC Plant Biol. 2024 Sep 30;24:894. doi: 10.1186/s12870-024-05602-7 (PMC11441126; doi:10.1186/s12870-024-05602-7), 2024-09-30

## Raw data

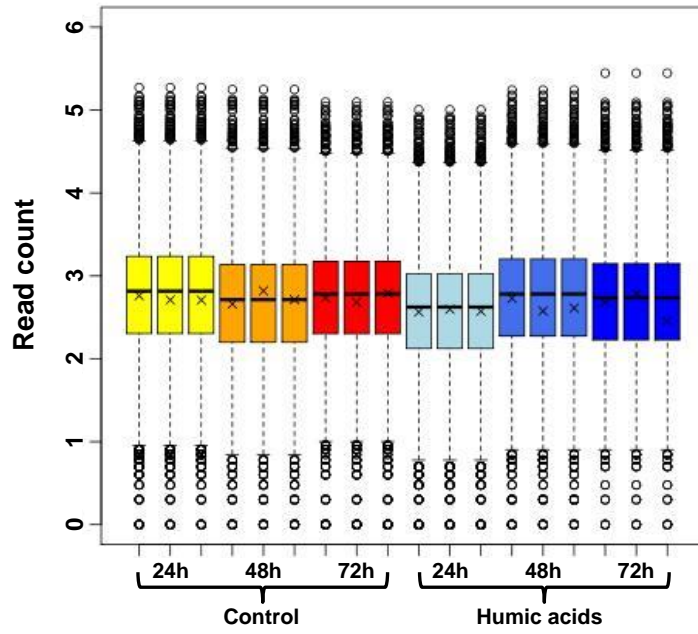

## Normalized data

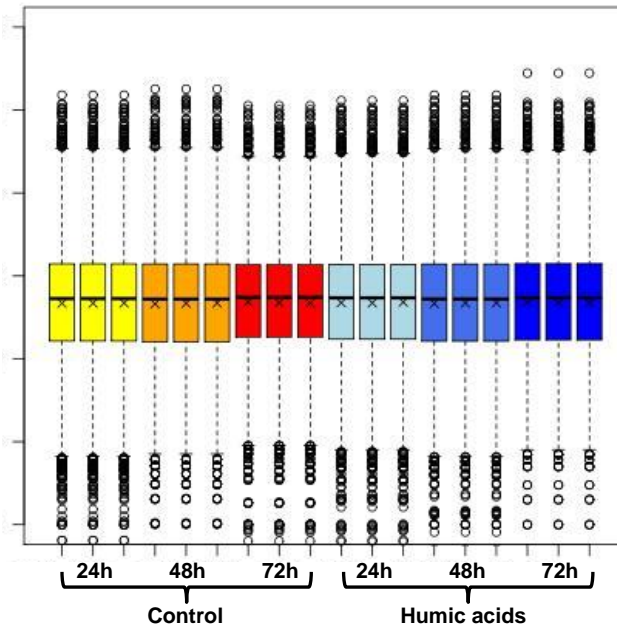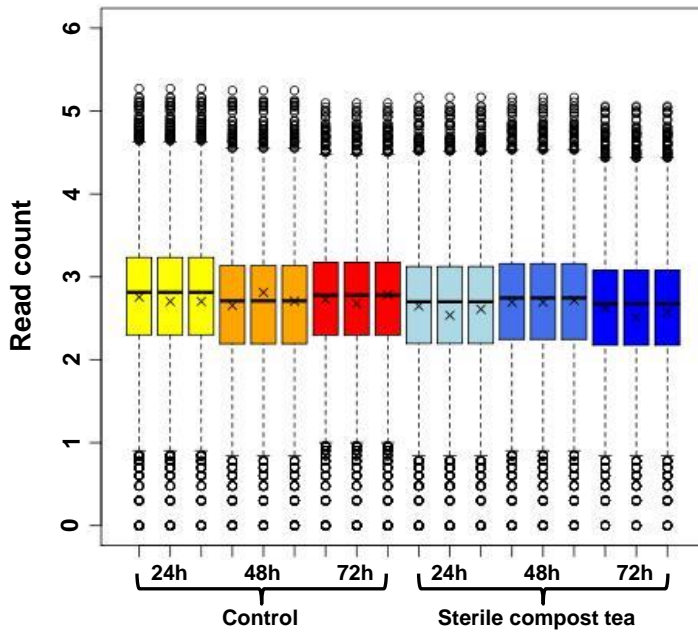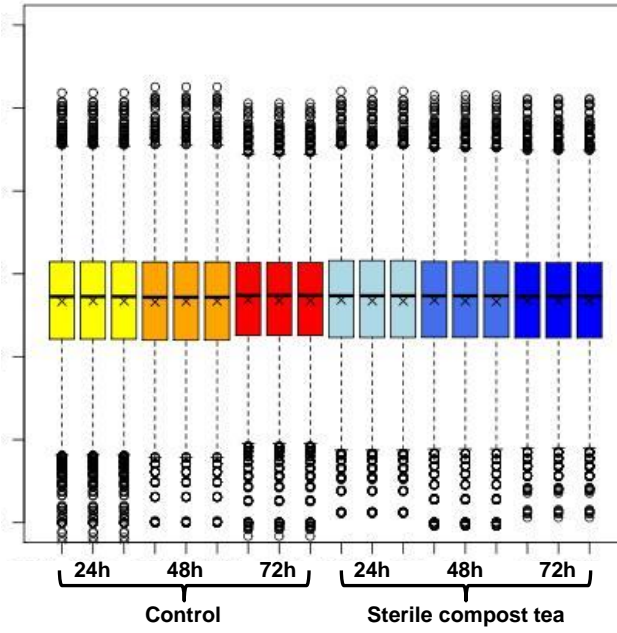

Supplement: 12870_2024_5602_MOESM2_ESM.pdf [file 12870_2024_5602_MOESM2_ESM.pdf]

# 24h

# 48h

# 72h

## Humic acids

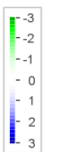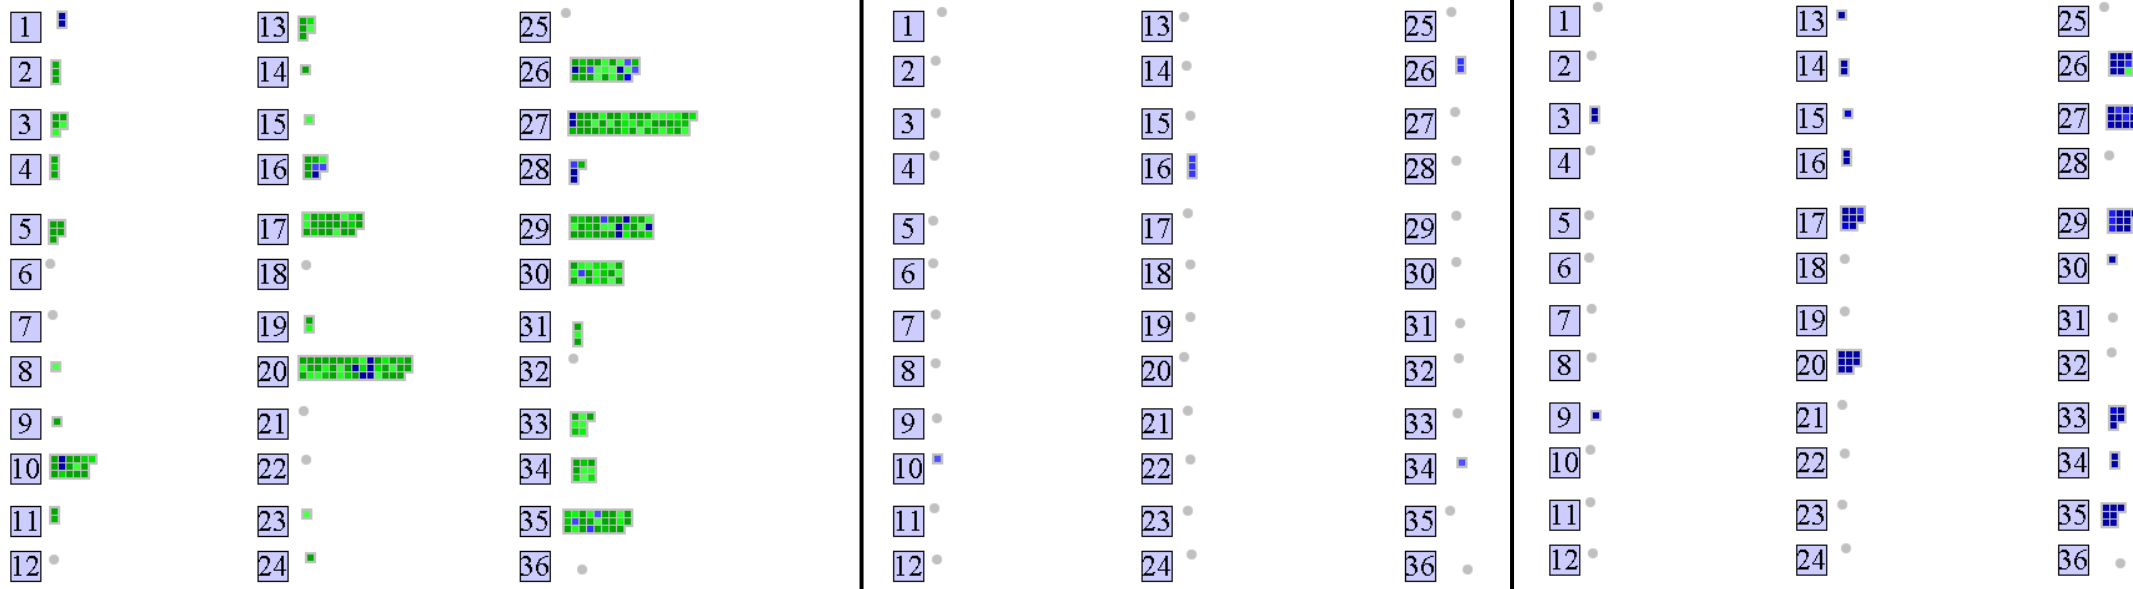

## Sterile compost tea

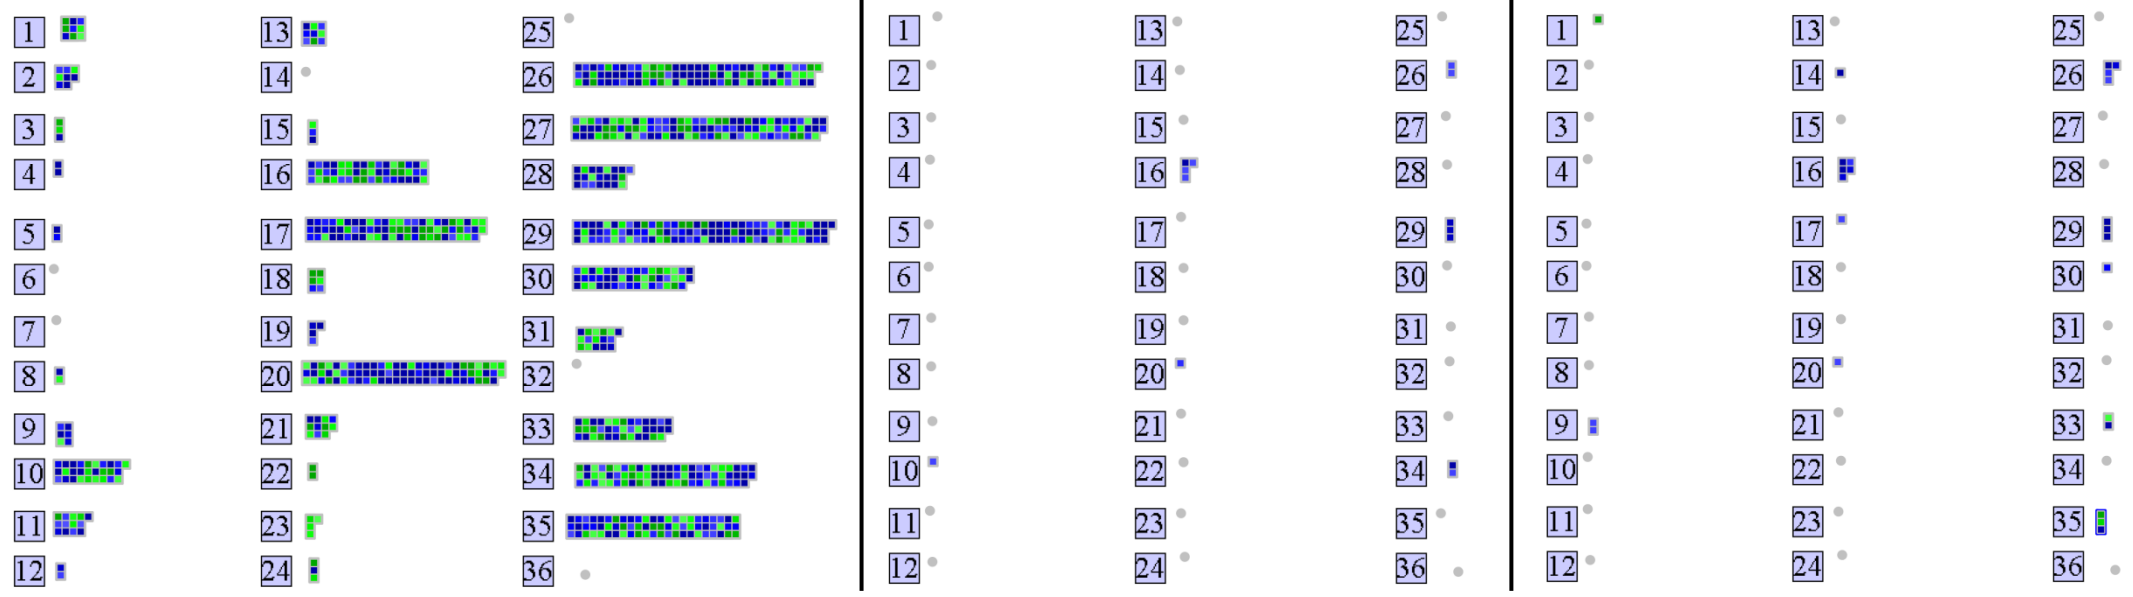

Supplement: 12870_2024_5602_MOESM4_ESM.pdf [file 12870_2024_5602_MOESM4_ESM.pdf]

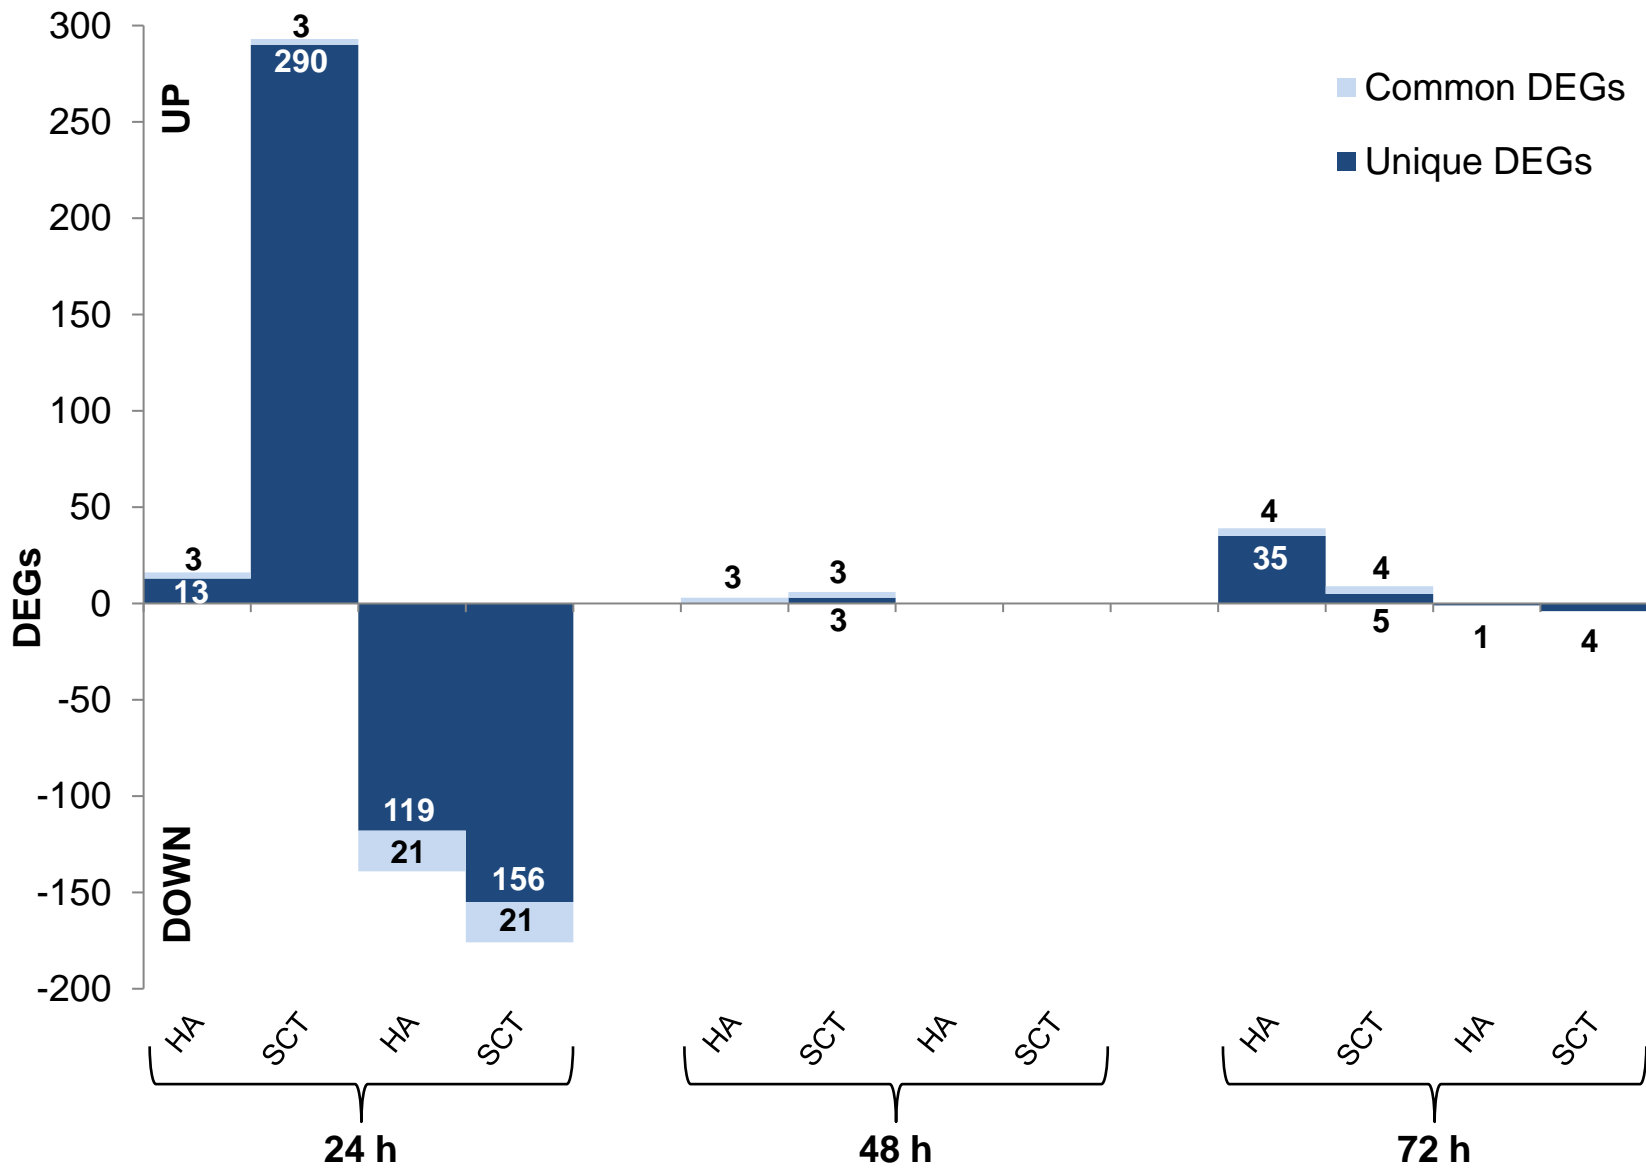

Supplement: 12870_2024_5602_MOESM5_ESM.pdf [file 12870_2024_5602_MOESM5_ESM.pdf]

# Humic acids

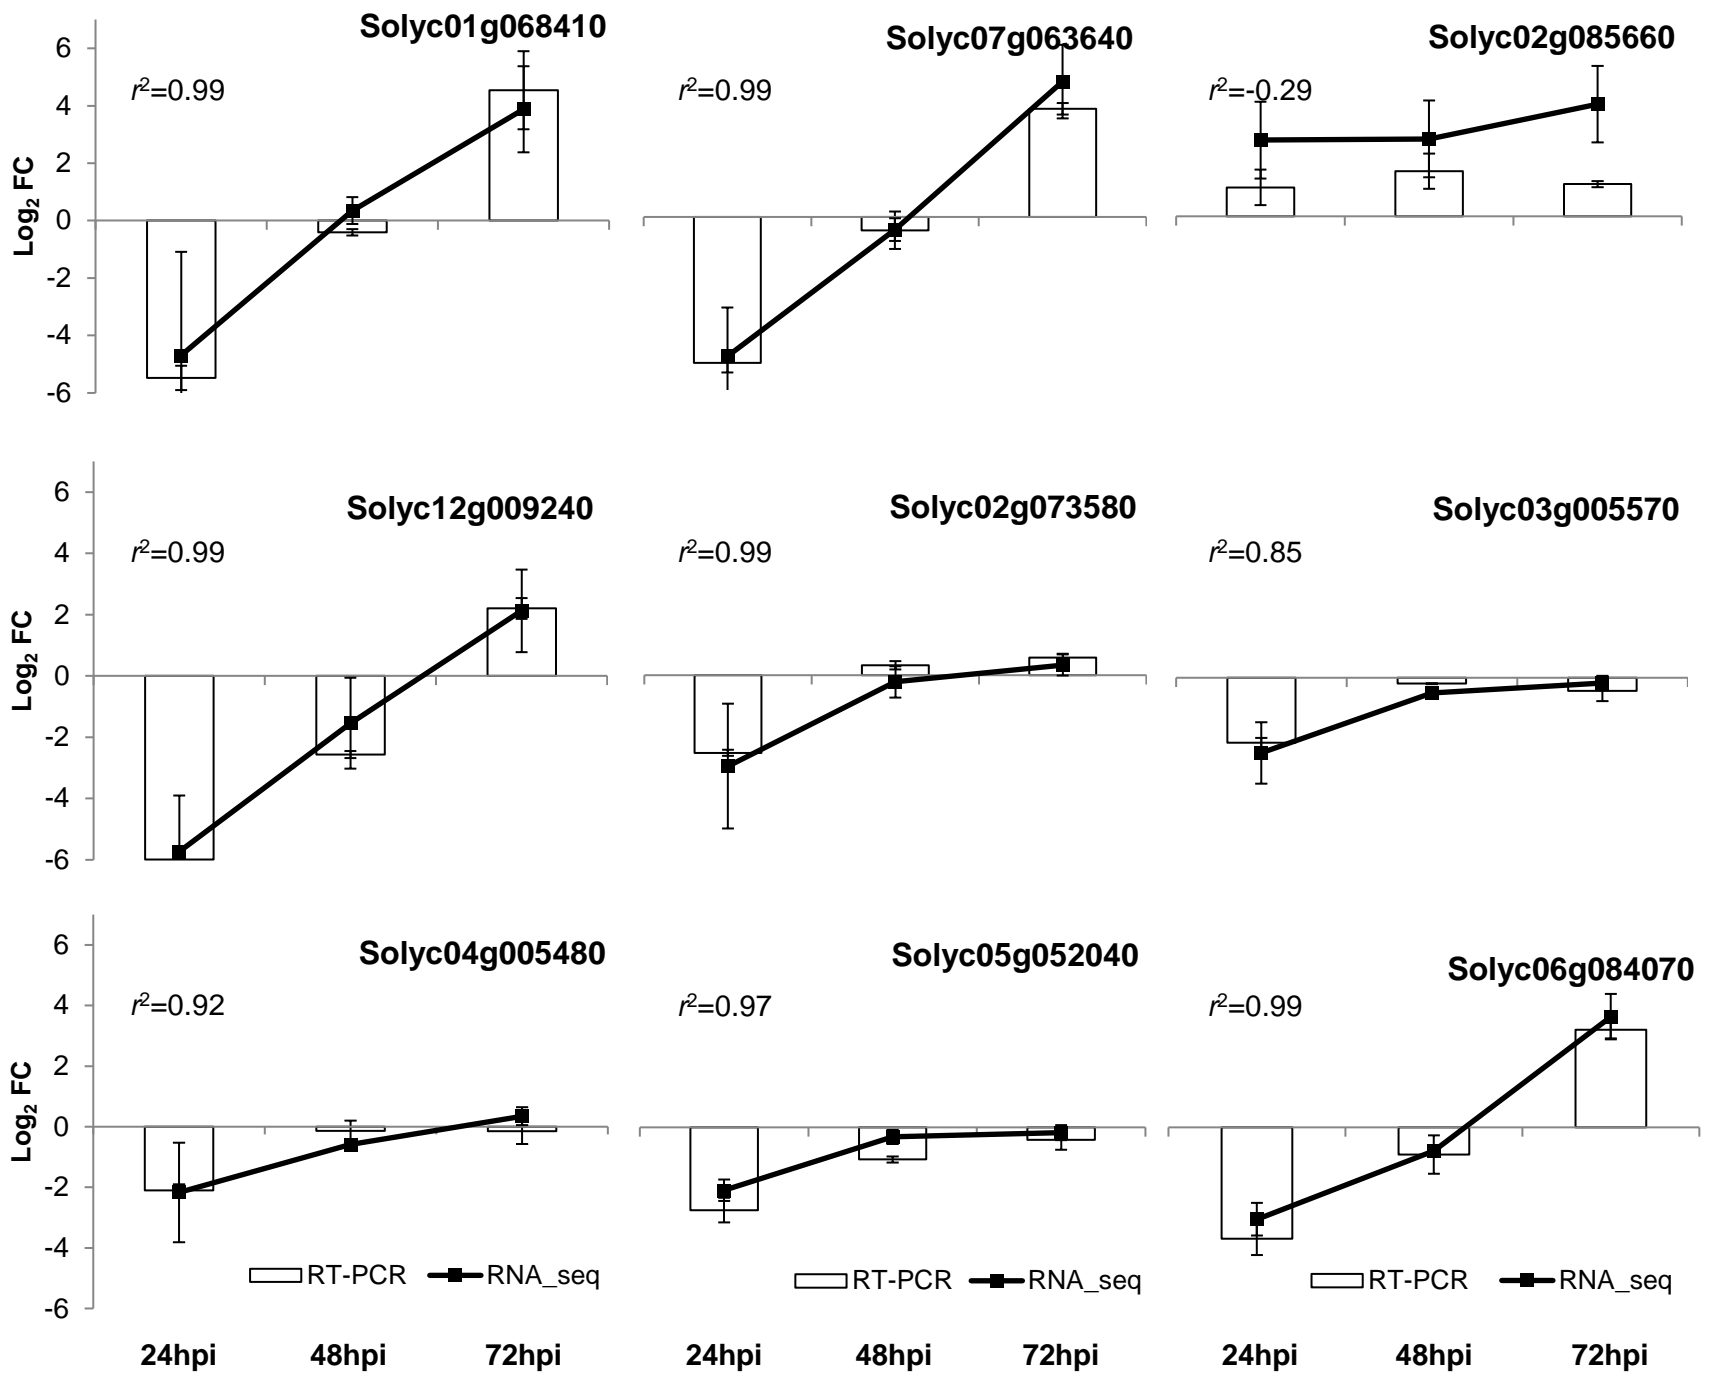

# Sterile compost tea

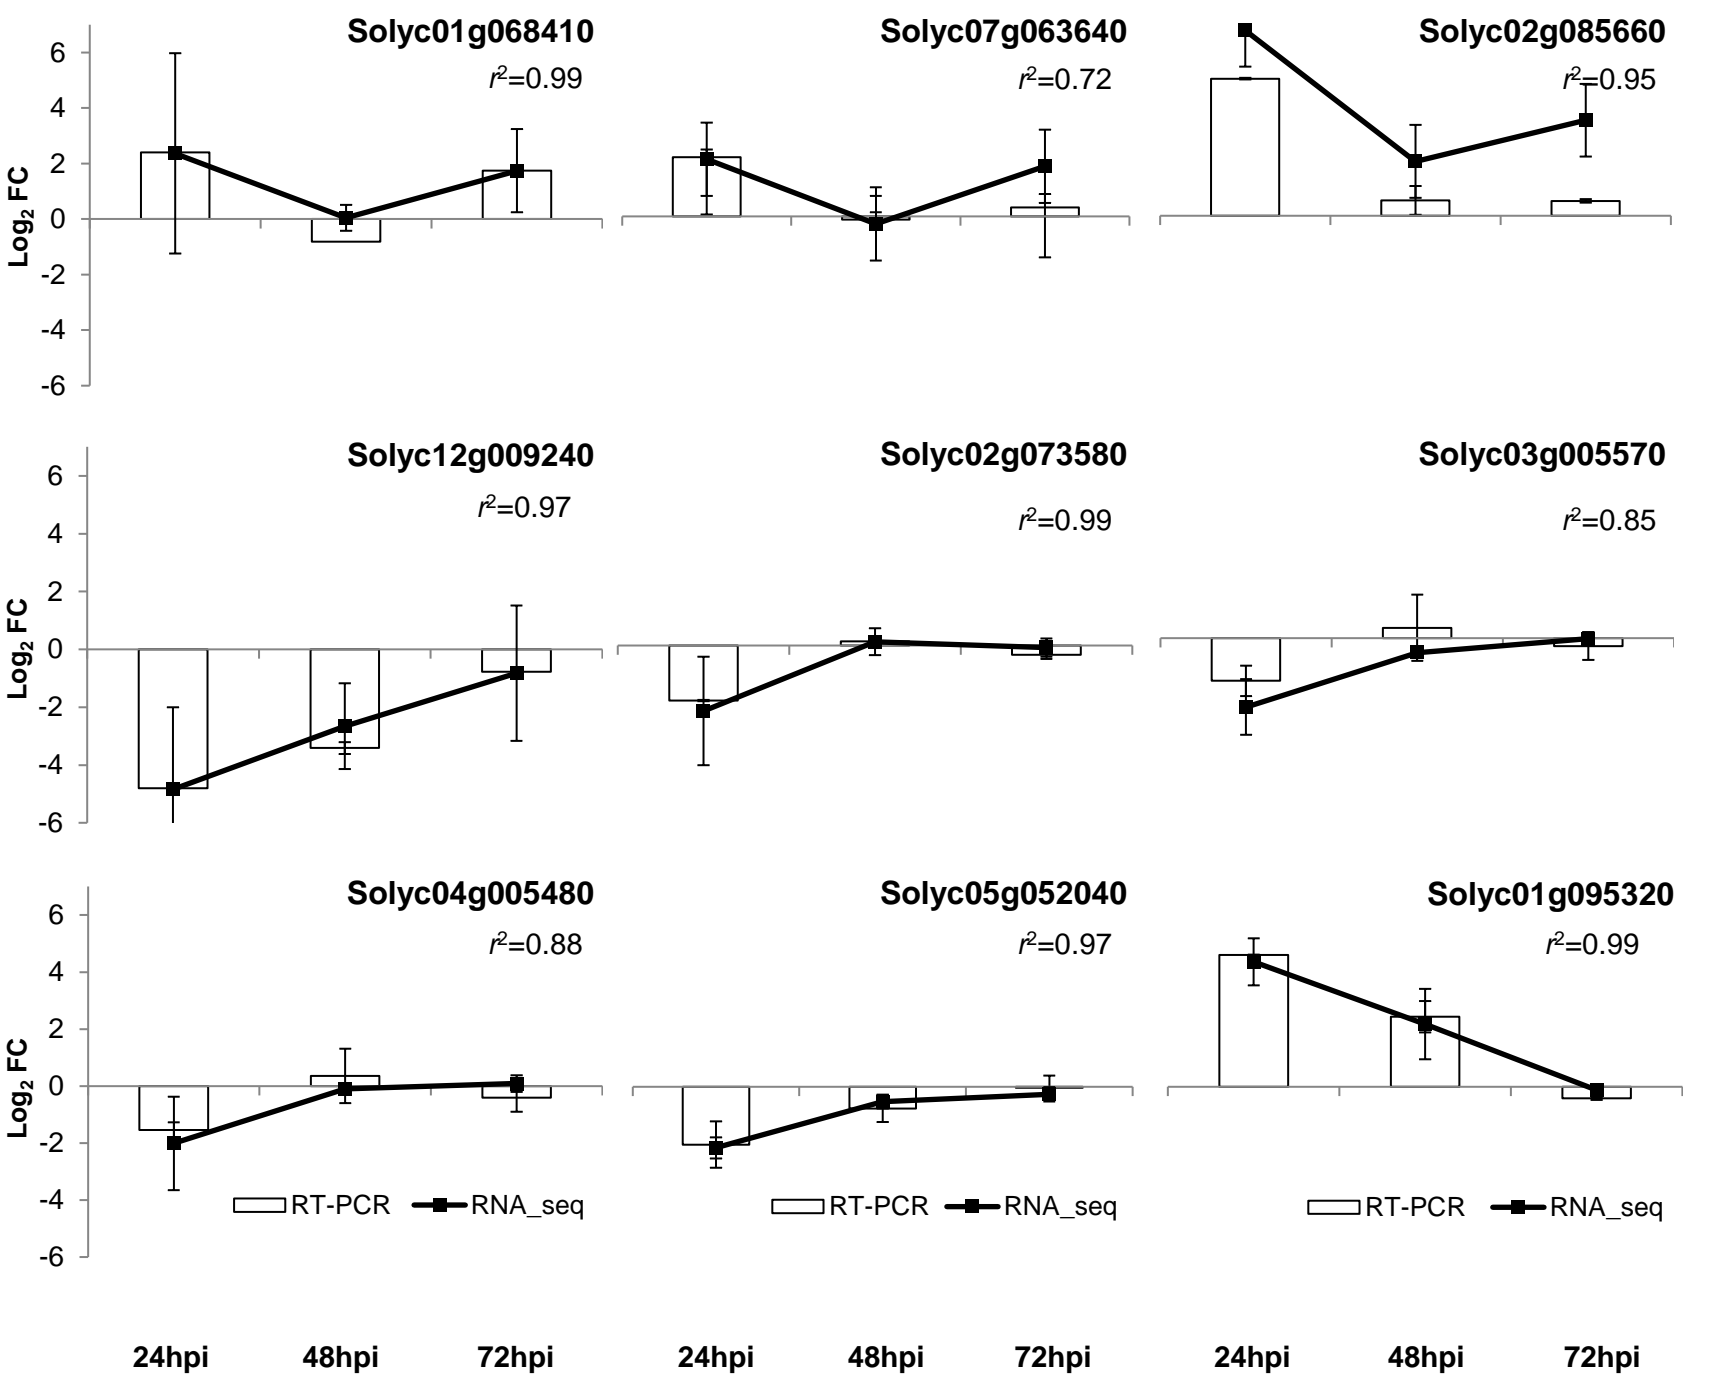

Supplement: 12870_2024_5602_MOESM6_ESM.pdf [file 12870_2024_5602_MOESM6_ESM.pdf]
